# Supplementary material
Source: PubMed Central journal article supplement (PMC2955099)
Supplement: 0912479107_pnas.200912479SI.pdf [file 0912479107_pnas.200912479SI.pdf]

# Supporting Information

Smoum et al. 10.1073/pnas.0912479107

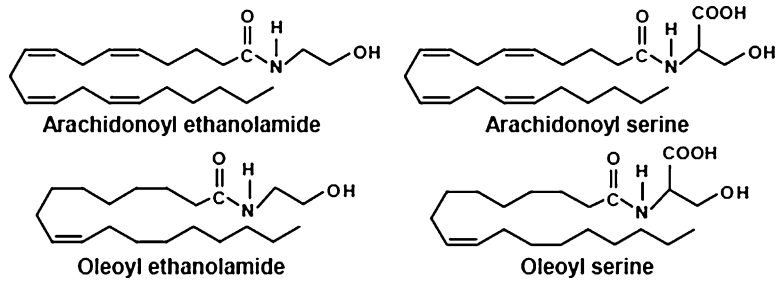

Fig. S1. Structures of oleoyl serine and related compounds.

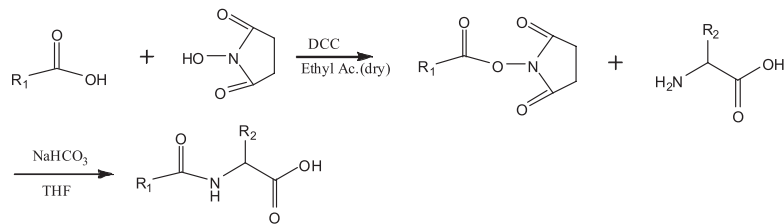

Fig. S2. Synthesis of *N*-acyl amino acids. R1, acyl chain of fatty acid; R2, amino acid moiety.

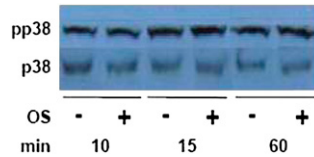

Fig. S3. *N*-oleoyl-L-serine (OS), at  $10^{-11}$  M does not affect p38 phosphorylation in MC3T3 E1 cell. Western blot analysis.



**Table S1. Measured masses, mass errors, and proposed formulae of theoretically justified peaks in product ion scan of partially purified mouse trabecular bone extract shown in Fig. 1A**

| Peaks <i>m/z</i> (ppm error) | Proposed formulae                                            | Comments                                                                          |
|------------------------------|--------------------------------------------------------------|-----------------------------------------------------------------------------------|
| 368.2783 (-6.3)              | C <sub>21</sub> H <sub>38</sub> NO <sub>4</sub> <sup>-</sup> | [M-H] <sup>-</sup>                                                                |
| 338.2734 (9.8)               | C <sub>20</sub> H <sub>36</sub> NO <sub>3</sub> <sup>-</sup> | [M-H] <sup>-</sup> - CH <sub>2</sub> O                                            |
| 320.2630 (10.9)              | C <sub>20</sub> H <sub>34</sub> NO <sub>2</sub> <sup>-</sup> | [M-H] <sup>-</sup> - CH <sub>2</sub> O - H <sub>2</sub> O                         |
| 306.2824 (7)                 | C <sub>20</sub> H <sub>36</sub> NO <sup>-</sup>              | [M-H] <sup>-</sup> - CO <sub>2</sub> - H <sub>2</sub> O                           |
| 294.2816 (4.6)               | C <sub>19</sub> H <sub>36</sub> NO <sup>-</sup>              | [M-H] <sup>-</sup> - C <sub>2</sub> H <sub>2</sub> O <sub>3</sub>                 |
| 280.2580 (-23.5)             | C <sub>18</sub> H <sub>34</sub> NO <sup>-</sup>              | [M-H] <sup>-</sup> - C <sub>3</sub> H <sub>4</sub> O <sub>3</sub>                 |
| 263.2394 (5.1)               | C <sub>18</sub> H <sub>31</sub> O <sup>-</sup>               | [M-H] <sup>-</sup> - C <sub>3</sub> H <sub>7</sub> NO <sub>3</sub> (Ser)          |
| 104.0337 (-15.5)             | C <sub>3</sub> H <sub>6</sub> NO <sub>3</sub> <sup>-</sup>   | [M-H] <sup>-</sup> - C <sub>18</sub> H <sub>32</sub> O, or [Ser - H] <sup>-</sup> |
| 74.0253 (7.4)                | C <sub>2</sub> H <sub>4</sub> NO <sub>2</sub> <sup>-</sup>   | [M-H] <sup>-</sup> - C <sub>18</sub> H <sub>32</sub> O - CH <sub>2</sub> O        |

**Table S2. Tissue and cell culture levels of OS**

| Tissue/culture                | OS content (pmol/g wet tissue) |
|-------------------------------|--------------------------------|
| Distal femoral metaphysis     | 3.20 ± 0.25                    |
| Whole brain                   | 32.32 ± 3.40                   |
| Spleen                        | 0.32 ± 0.09                    |
| Plasma                        | Undetectable                   |
| MC3T3 E1 osteoblastic cells   | 1,350 ± 199                    |
| Newborn calvarial osteoblasts | 1,390 ± 451                    |

Data are mean ± SE obtained in seven mice or 12 culture dishes for each cell type.

**Table S3. Trabecular bone parameters measures in 3D micro-computed tomographic (μCT) images of L3 vertebrae from intact mice**

| Treatment parameter         | Intact/VEH    | Intact/OS     |
|-----------------------------|---------------|---------------|
| BV/TV (%)                   | 12.58 ± 0.29  | 11.98 ± 0.65  |
| Tb.N (mm <sup>-1</sup> )    | 3.59 ± 0.07   | 3.51 ± 0.14   |
| Tb.Th (mm)                  | 0.057 ± 0.001 | 0.055 ± 0.001 |
| Conn. D (mm <sup>-3</sup> ) | 51.4 ± 2.8    | 50.7 ± 3.5    |

Data are mean ± SE obtain in same animals reported in Fig. 5.

**Table S4. Cortical, middiaphyseal parameters measures in 3D μCT images of femora from intact mice**

| Treatment parameter | Intact/VEH  | Intact/OS   |
|---------------------|-------------|-------------|
| Dia.Dia (mm)        | 1.48 ± 0.01 | 1.46 ± 0.02 |
| Med.Dia (mm)        | 1.24 ± 0.01 | 1.21 ± 0.02 |
| Cort.Th (μm)        | 133 ± 5     | 133 ± 3     |

Dia.Dia, diaphyseal diameter; Med.Dia, medullary cavity diameter; Cort.Th, cortical thickness. Data are mean ± SE obtain in same animals reported in Fig. 5.

**Table S5. Cortical, middiaphyseal parameters measures in 3D μCT images of femora from sham-OVX and OVX mice**

| Treatment parameter | Sham-OVX    | OVX/VEH      | OVX/OS       |
|---------------------|-------------|--------------|--------------|
| Dia.Dia (mm)        | 1.41 ± 0.01 | 1.41 ± 0.01  | 1.41 ± 0.01  |
| Med.Dia (mm)        | 1.04 ± 0.01 | 1.09 ± 0.01* | 1.08 ± 0.01* |
| Cort.Th (μm)        | 197 ± 3     | 170 ± 4*     | 176 ± 10*    |

Data are mean ± SE obtain in same animals reported in Fig. 6.

\*Versus sham-OVX, *P* < 0.05.
